# Supplementary material for: In silico investigation on the separation of disulfide bonds by N-heterocyclic carbene
Source: Royal Society of Chemistry journal article supplement (doi:10.1039/d4cp02672a), 2024-01-01
Supplement: d4cp02672a1.pdf [file d4cp02672a1.pdf]

## In-silico Investigation on the Separation of Disulfide Bond by N- Heterocyclic Carbene

Swapan Sinha<sup>a,b</sup>, Subhra Das<sup>a,d</sup>, Kritish Kumar Ray<sup>e</sup> Sibaprasad Maity<sup>c</sup>, Gourisankar Roymahapatra,<sup>a</sup> Santanab Giri<sup>a\*</sup>

a. School of Applied Science and Humanities, Haldia Institute of Technology, Haldia, India 721657,

b. Maulana Abul Kalam Azad University of Technology, Haringhata, 741249, India

c. Sagardighat Kamada Kinkar Smriti Mahavidyalaya, Murshidabad, West Bengal, 742226, India.

d. Department of Chemistry, Cooch Behar Panchanan Barma University, Cooch Behar, West Bengal, 736101, India

e. Department of Chemistry, National Institute of Technology Rourkela, Odisha, 769008, India

Corresponding Author

\* Email: [santanab.giri@gmail.com](mailto:santanab.giri@gmail.com), [sgiri.chem@hithaldia.in](mailto:sgiri.chem@hithaldia.in)

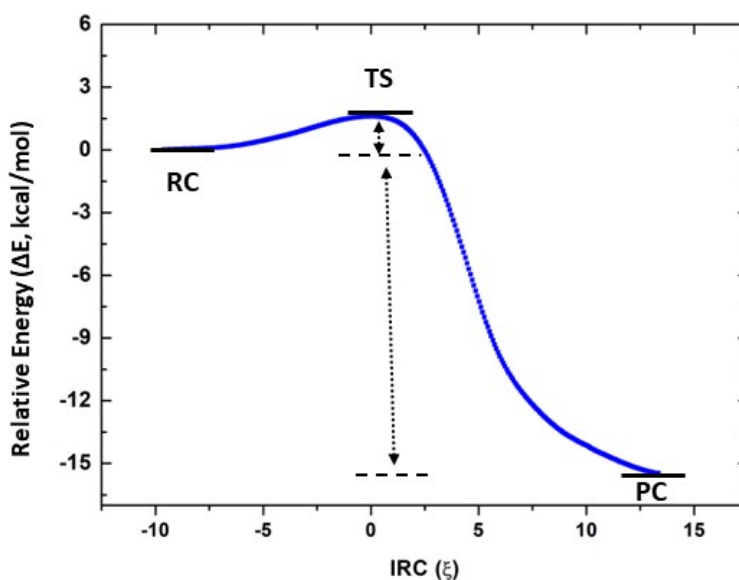

**Fig. S1:** The calculated IRC of the Reaction-3, the relative energy data is given with respect to reactant complex (RC) in water medium. (In kcal/mol unit)

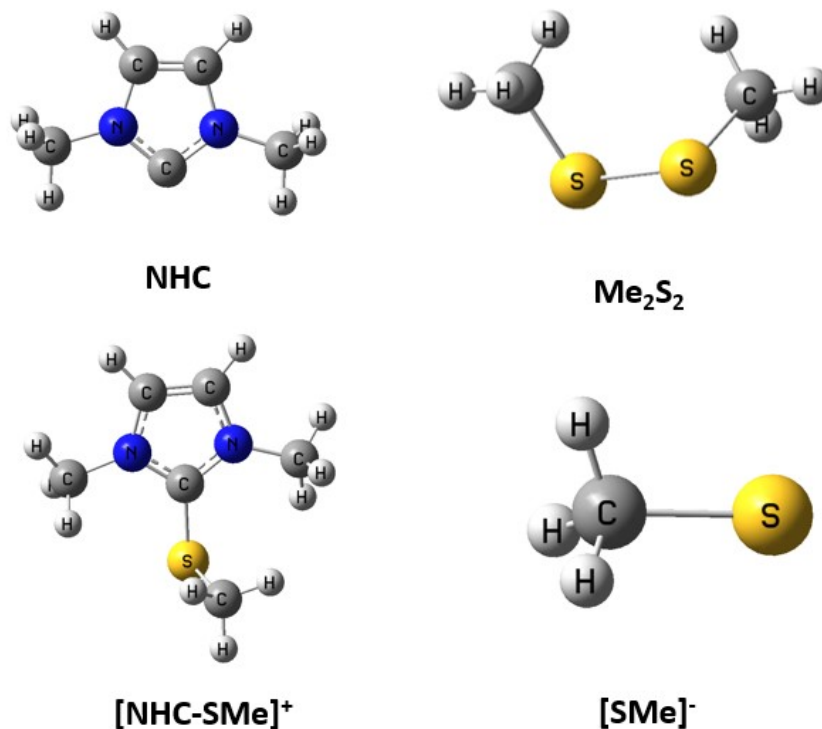

**Fig. S2:** The optimized geometries of individual reactants and products at M06-2X/6-311G (d, p) in water medium.

**Table S1:** The AIM analysis of reactant complex (RC), TS and product complex (PC) at BCPs for Reaction 3 in a.u. unit.

| Systems          | Bond | BCP | Electron Density | Energy Density<br>H(r) |
|------------------|------|-----|------------------|------------------------|
| Reactant Complex | S-S  | Yes | 0.1374           | -0.0673                |
|                  | C-S  | No  | -                | -                      |
| TS               | S-S  | Yes | 0.0991           | -0.0320                |
|                  | C-S  | Yes | 0.0369           | -0.0038                |
| Product Complex  | S-S  | No  | -                | -                      |
|                  | C-S  | Yes | 0.1940           | -0.1707                |

**Table S2:** Calculated thermodynamic parameter in both gas and solvent phase at M06-2X/6311G (d, p) level. (data given in kcal/mol unit)

| No   | Activation Energy   |                     |                     |                     |                     |                     |                     |                     | Reaction Energy |              |              |              |              |              |              |              |
|------|---------------------|---------------------|---------------------|---------------------|---------------------|---------------------|---------------------|---------------------|-----------------|--------------|--------------|--------------|--------------|--------------|--------------|--------------|
|      | Gas                 |                     | Water               |                     | DMSO                |                     | Acetone             |                     | Gas             |              | Water        |              | DMSO         |              | Acetone      |              |
|      | $\Delta G^\ddagger$ | $\Delta H^\ddagger$ | $\Delta G_R$    | $\Delta H_R$ | $\Delta G_R$ | $\Delta H_R$ | $\Delta G_R$ | $\Delta H_R$ | $\Delta G_R$ | $\Delta H_R$ |
| Rea1 | 43.5                | 42.1                | 15.7                | 12.5                | 15.7                | 12.6                | 16.1                | 13.0                | 26.1            | 24.6         | 9.3          | 4.9          | 8.8          | 6.1          | 10.6         | 7.8          |
| Rea2 | 40.6                | 39.8                | 15.8                | 16.3                | 16.2                | 16.5                | 17.2                | 17.1                | 19.0            | 18.3         | 13.4         | 12.7         | 15.4         | 12.6         | 16.3         | 15.0         |
| Rea3 | 22.2                | 21.8                | 6.8                 | 8.0                 | 7.1                 | 8.1                 | 7.4                 | 8.1                 | 3.8             | 4.2          | -8.4         | -7.9         | -7.8         | -7.4         | -7.1         | -6.0         |

### Reaction Coordinate:

#### For Reaction 1

#### Reactant Complex (RC)

Standard orientation:

| Center Number | Atomic Number | Atomic Type | Coordinates (Angstroms) |           |           |
|---------------|---------------|-------------|-------------------------|-----------|-----------|
|               |               |             | X                       | Y         | Z         |
| 1             | 16            | 0           | -3.000812               | 0.414526  | -0.655242 |
| 2             | 16            | 0           | -1.177974               | 0.145803  | 0.298208  |
| 3             | 6             | 0           | -4.176883               | 0.128549  | 0.702191  |
| 4             | 1             | 0           | -4.008894               | 0.846906  | 1.501735  |
| 5             | 1             | 0           | -5.171556               | 0.275138  | 0.280009  |
| 6             | 1             | 0           | -4.091816               | -0.889144 | 1.078538  |
| 7             | 6             | 0           | -0.991259               | -1.661110 | 0.209155  |
| 8             | 1             | 0           | -0.989463               | -1.987799 | -0.829320 |
| 9             | 1             | 0           | -0.029392               | -1.889766 | 0.669906  |
| 10            | 1             | 0           | -1.787433               | -2.155633 | 0.762420  |
| 11            | 15            | 0           | 2.359528                | -0.018461 | 0.382261  |
| 12            | 6             | 0           | 2.364697                | 1.756047  | -0.137074 |
| 13            | 1             | 0           | 2.680506                | 2.380035  | 0.700972  |
| 14            | 1             | 0           | 3.039350                | 1.923115  | -0.980876 |
| 15            | 6             | 0           | 4.183325                | -0.290596 | 0.537964  |
| 16            | 1             | 0           | 4.715623                | 0.046978  | -0.355278 |
| 17            | 1             | 0           | 4.559984                | 0.254421  | 1.405345  |
| 18            | 6             | 0           | 2.081396                | -0.810362 | -1.267156 |

|    |   |   |          |           |           |
|----|---|---|----------|-----------|-----------|
| 19 | 1 | 0 | 2.179082 | -1.894244 | -1.176762 |
| 20 | 1 | 0 | 1.069706 | -0.585056 | -1.611053 |
| 21 | 1 | 0 | 1.352969 | 2.050997  | -0.421617 |
| 22 | 1 | 0 | 4.381976 | -1.352837 | 0.691145  |
| 23 | 1 | 0 | 2.799356 | -0.446630 | -2.007005 |

### Transition State (TS)

Standard orientation:

| Center<br>Number | Atomic<br>Number | Atomic<br>Type | Coordinates (Angstroms) |           |           |
|------------------|------------------|----------------|-------------------------|-----------|-----------|
|                  |                  |                | X                       | Y         | Z         |
| 1                | 16               | 0              | -3.047904               | -0.352576 | -0.003206 |
| 2                | 16               | 0              | -0.650748               | -0.156689 | -0.002478 |
| 3                | 6                | 0              | -3.264219               | 1.455866  | 0.004455  |
| 4                | 1                | 0              | -2.807200               | 1.901535  | -0.880106 |
| 5                | 1                | 0              | -4.328686               | 1.687798  | 0.001666  |
| 6                | 1                | 0              | -2.813376               | 1.893414  | 0.896153  |
| 7                | 6                | 0              | -0.558843               | -1.983643 | 0.004288  |
| 8                | 1                | 0              | -1.057472               | -2.364855 | -0.884302 |
| 9                | 1                | 0              | 0.481485                | -2.302597 | 0.000765  |
| 10               | 1                | 0              | -1.049940               | -2.358355 | 0.899782  |
| 11               | 15               | 0              | 1.753725                | 0.133195  | -0.000247 |
| 12               | 6                | 0              | 1.877798                | 1.949416  | -0.005299 |
| 13               | 1                | 0              | 1.378678                | 2.345593  | 0.880297  |
| 14               | 1                | 0              | 2.921828                | 2.266434  | -0.005388 |
| 15               | 6                | 0              | 2.735406                | -0.392043 | 1.447995  |
| 16               | 1                | 0              | 3.748175                | 0.013019  | 1.390878  |
| 17               | 1                | 0              | 2.249774                | -0.033695 | 2.356322  |
| 18               | 6                | 0              | 2.740630                | -0.400492 | -1.441876 |
| 19               | 1                | 0              | 2.787599                | -1.489741 | -1.469733 |
| 20               | 1                | 0              | 2.259351                | -0.045685 | -2.353899 |
| 21               | 1                | 0              | 1.380016                | 2.340649  | -0.893841 |
| 22               | 1                | 0              | 2.783910                | -1.481078 | 1.481115  |
| 23               | 1                | 0              | 3.753792                | 0.003255  | -1.382426 |

### Product Complex (PC)

Standard orientation:

| Center<br>Number | Atomic<br>Number | Atomic<br>Type | Coordinates (Angstroms) |           |           |
|------------------|------------------|----------------|-------------------------|-----------|-----------|
|                  |                  |                | X                       | Y         | Z         |
| 1                | 16               | 0              | -3.598245               | -0.371372 | -0.037329 |
| 2                | 16               | 0              | -0.248913               | -0.129023 | -0.003536 |
| 3                | 6                | 0              | -3.236853               | 1.431646  | 0.046393  |
| 4                | 1                | 0              | -2.626228               | 1.745595  | -0.802906 |

|    |    |   |           |           |           |
|----|----|---|-----------|-----------|-----------|
| 5  | 1  | 0 | -4.155817 | 2.020029  | 0.036813  |
| 6  | 1  | 0 | -2.687703 | 1.677229  | 0.957665  |
| 7  | 6  | 0 | -0.249370 | -1.956265 | 0.036832  |
| 8  | 1  | 0 | -1.309395 | -2.202638 | 0.009475  |
| 9  | 1  | 0 | 0.249634  | -2.370406 | -0.836568 |
| 10 | 1  | 0 | 0.192052  | -2.325098 | 0.960050  |
| 11 | 15 | 0 | 1.806886  | 0.201820  | -0.004057 |
| 12 | 6  | 0 | 1.980738  | 1.991622  | 0.085170  |
| 13 | 1  | 0 | 1.533445  | 2.353665  | 1.010682  |
| 14 | 1  | 0 | 3.041633  | 2.242871  | 0.065833  |
| 15 | 6  | 0 | 2.612164  | -0.559111 | 1.418149  |
| 16 | 1  | 0 | 3.662011  | -0.260575 | 1.420982  |
| 17 | 1  | 0 | 2.123643  | -0.215316 | 2.329706  |
| 18 | 6  | 0 | 2.587073  | -0.398266 | -1.514967 |
| 19 | 1  | 0 | 2.481800  | -1.480843 | -1.583289 |
| 20 | 1  | 0 | 2.108594  | 0.075911  | -2.371594 |
| 21 | 1  | 0 | 1.481483  | 2.445129  | -0.771125 |
| 22 | 1  | 0 | 2.546565  | -1.644695 | 1.345908  |
| 23 | 1  | 0 | 3.646999  | -0.139590 | -1.486407 |

-----

## For Reaction 2

### Reactant Complex (RC)

Standard orientation:

| Center<br>Number | Atomic<br>Number | Atomic<br>Type | Coordinates (Angstroms) |           |           |
|------------------|------------------|----------------|-------------------------|-----------|-----------|
|                  |                  |                | X                       | Y         | Z         |
| 1                | 16               | 0              | 4.886781                | -1.600354 | 0.380015  |
| 2                | 16               | 0              | 2.835079                | -1.586465 | 0.693711  |
| 3                | 6                | 0              | 5.132239                | 0.031722  | -0.382156 |
| 4                | 1                | 0              | 4.794441                | 0.822510  | 0.286436  |
| 5                | 1                | 0              | 6.204709                | 0.135809  | -0.549646 |
| 6                | 1                | 0              | 4.604561                | 0.084411  | -1.332438 |
| 7                | 6                | 0              | 2.731736                | -0.756442 | 2.308300  |
| 8                | 1                | 0              | 3.168978                | 0.240479  | 2.257876  |
| 9                | 1                | 0              | 1.668817                | -0.676333 | 2.540339  |
| 10               | 1                | 0              | 3.234131                | -1.349633 | 3.069187  |
| 11               | 15               | 0              | -0.717049               | -0.475372 | 0.421920  |
| 12               | 6                | 0              | 0.258491                | 0.322965  | -0.940781 |
| 13               | 1                | 0              | 0.860338                | -0.468369 | -1.392569 |
| 14               | 1                | 0              | -0.394535               | 0.718559  | -1.723421 |
| 15               | 6                | 0              | -1.980032               | -1.357278 | -0.616206 |
| 16               | 1                | 0              | -2.377272               | -0.699665 | -1.394005 |
| 17               | 1                | 0              | -1.458005               | -2.171849 | -1.124711 |
| 18               | 6                | 0              | -1.701540               | 0.967377  | 1.065803  |
| 19               | 1                | 0              | -2.365002               | 0.581538  | 1.844360  |
| 20               | 1                | 0              | -0.994365               | 1.621537  | 1.583311  |

|    |   |   |           |           |           |
|----|---|---|-----------|-----------|-----------|
| 21 | 6 | 0 | 1.177939  | 1.414409  | -0.409332 |
| 22 | 1 | 0 | 0.634579  | 2.337284  | -0.185835 |
| 23 | 1 | 0 | 1.662823  | 1.116662  | 0.526853  |
| 24 | 6 | 0 | -2.500040 | 1.768449  | 0.048977  |
| 25 | 1 | 0 | -1.870791 | 2.150920  | -0.760733 |
| 26 | 1 | 0 | -3.277210 | 1.167262  | -0.431234 |
| 27 | 6 | 0 | -3.114001 | -1.925442 | 0.225324  |
| 28 | 1 | 0 | -3.691540 | -1.139406 | 0.721668  |
| 29 | 1 | 0 | -2.738083 | -2.573320 | 1.023591  |
| 30 | 6 | 0 | 2.287120  | 1.759844  | -1.368502 |
| 31 | 8 | 0 | 2.503403  | 1.219052  | -2.421420 |
| 32 | 8 | 0 | 3.049737  | 2.757044  | -0.896819 |
| 33 | 1 | 0 | 3.748726  | 2.934781  | -1.542839 |
| 34 | 6 | 0 | -3.183802 | 2.961010  | 0.669576  |
| 35 | 8 | 0 | -3.105460 | 3.294664  | 1.822258  |
| 36 | 8 | 0 | -3.909744 | 3.635422  | -0.233446 |
| 37 | 1 | 0 | -4.317446 | 4.391503  | 0.212675  |
| 38 | 6 | 0 | -4.082308 | -2.740268 | -0.593636 |
| 39 | 8 | 0 | -3.978183 | -2.981956 | -1.766981 |
| 40 | 8 | 0 | -5.104366 | -3.184423 | 0.151272  |
| 41 | 1 | 0 | -5.689775 | -3.701517 | -0.420398 |

-----

Transition State (TS)

Standard orientation:

| Center<br>Number | Atomic<br>Number | Atomic<br>Type | Coordinates (Angstroms) |           |           |
|------------------|------------------|----------------|-------------------------|-----------|-----------|
|                  |                  |                | X                       | Y         | Z         |
| 1                | 16               | 0              | -3.987418               | -2.015554 | -1.332809 |
| 2                | 16               | 0              | -1.806040               | -1.052575 | -0.655128 |
| 3                | 6                | 0              | -4.789795               | -1.239674 | 0.109515  |
| 4                | 1                | 0              | -4.569289               | -0.170522 | 0.138649  |
| 5                | 1                | 0              | -5.869629               | -1.367405 | 0.040780  |
| 6                | 1                | 0              | -4.442889               | -1.694589 | 1.038173  |
| 7                | 6                | 0              | -1.048433               | -1.942315 | -2.064483 |
| 8                | 1                | 0              | -1.598000               | -1.676906 | -2.964506 |
| 9                | 1                | 0              | -0.005856               | -1.653302 | -2.183288 |
| 10               | 1                | 0              | -1.116271               | -3.012990 | -1.885399 |
| 11               | 15               | 0              | 0.179833                | -0.092857 | 0.095750  |
| 12               | 6                | 0              | -0.461519               | 1.192605  | 1.223296  |
| 13               | 1                | 0              | -1.205144               | 0.704531  | 1.859848  |
| 14               | 1                | 0              | 0.341125                | 1.540823  | 1.877719  |
| 15               | 6                | 0              | 1.201411                | -1.166538 | 1.167939  |
| 16               | 1                | 0              | 1.992611                | -0.577556 | 1.638728  |
| 17               | 1                | 0              | 0.539981                | -1.517127 | 1.964312  |
| 18               | 6                | 0              | 1.313821                | 0.751681  | -1.072184 |
| 19               | 1                | 0              | 1.766659                | -0.009171 | -1.712069 |
| 20               | 1                | 0              | 0.692365                | 1.369051  | -1.725886 |
| 21               | 6                | 0              | -1.102093               | 2.353672  | 0.471468  |

|    |   |   |           |           |           |
|----|---|---|-----------|-----------|-----------|
| 22 | 1 | 0 | -0.371903 | 2.925847  | -0.107251 |
| 23 | 1 | 0 | -1.856306 | 2.004226  | -0.240280 |
| 24 | 6 | 0 | 2.398548  | 1.590234  | -0.405180 |
| 25 | 1 | 0 | 1.983467  | 2.366220  | 0.244158  |
| 26 | 1 | 0 | 3.059654  | 0.985080  | 0.220559  |
| 27 | 6 | 0 | 1.779777  | -2.355252 | 0.410699  |
| 28 | 1 | 0 | 2.456488  | -2.048098 | -0.391900 |
| 29 | 1 | 0 | 0.992167  | -2.955380 | -0.055216 |
| 30 | 6 | 0 | -1.783040 | 3.312484  | 1.416473  |
| 31 | 8 | 0 | -1.878684 | 3.167336  | 2.605642  |
| 32 | 8 | 0 | -2.284919 | 4.365160  | 0.761952  |
| 33 | 1 | 0 | -2.717140 | 4.944764  | 1.405839  |
| 34 | 6 | 0 | 3.264032  | 2.279900  | -1.432887 |
| 35 | 8 | 0 | 3.136986  | 2.185030  | -2.623978 |
| 36 | 8 | 0 | 4.210074  | 3.023545  | -0.850389 |
| 37 | 1 | 0 | 4.737852  | 3.442437  | -1.545772 |
| 38 | 6 | 0 | 2.554874  | -3.267359 | 1.329609  |
| 39 | 8 | 0 | 2.689616  | -3.109035 | 2.513254  |
| 40 | 8 | 0 | 3.084038  | -4.297158 | 0.660671  |
| 41 | 1 | 0 | 3.565522  | -4.852667 | 1.290739  |

-----

Product Complex (PC)

Standard orientation:

| Center<br>Number | Atomic<br>Number | Atomic<br>Type | Coordinates (Angstroms) |           |           |
|------------------|------------------|----------------|-------------------------|-----------|-----------|
|                  |                  |                | X                       | Y         | Z         |
| 1                | 16               | 0              | -4.464713               | -1.972755 | -1.549762 |
| 2                | 16               | 0              | -1.525164               | -0.891679 | -0.562221 |
| 3                | 6                | 0              | -4.793307               | -1.328585 | 0.141602  |
| 4                | 1                | 0              | -4.311509               | -0.358963 | 0.289526  |
| 5                | 1                | 0              | -5.863155               | -1.201643 | 0.314604  |
| 6                | 1                | 0              | -4.407259               | -2.011514 | 0.901054  |
| 7                | 6                | 0              | -0.886265               | -1.445697 | -2.185833 |
| 8                | 1                | 0              | -1.749157               | -1.945163 | -2.622220 |
| 9                | 1                | 0              | -0.603666               | -0.594288 | -2.799749 |
| 10               | 1                | 0              | -0.066350               | -2.151541 | -2.076400 |
| 11               | 15               | 0              | 0.199357                | -0.027546 | 0.240550  |
| 12               | 6                | 0              | -0.375817               | 1.311763  | 1.320311  |
| 13               | 1                | 0              | -1.126153               | 0.879959  | 1.988137  |
| 14               | 1                | 0              | 0.466293                | 1.624254  | 1.943953  |
| 15               | 6                | 0              | 1.122393                | -1.203232 | 1.268212  |
| 16               | 1                | 0              | 1.960488                | -0.670152 | 1.724274  |
| 17               | 1                | 0              | 0.444881                | -1.497534 | 2.073683  |
| 18               | 6                | 0              | 1.269965                | 0.647832  | -1.060003 |
| 19               | 1                | 0              | 1.602057                | -0.174788 | -1.696908 |
| 20               | 1                | 0              | 0.654927                | 1.303567  | -1.682173 |
| 21               | 6                | 0              | -0.962189               | 2.484500  | 0.542741  |
| 22               | 1                | 0              | -0.211365               | 3.003768  | -0.058258 |
| 23               | 1                | 0              | -1.749128               | 2.159870  | -0.144124 |

|    |   |   |           |           |           |
|----|---|---|-----------|-----------|-----------|
| 24 | 6 | 0 | 2.471292  | 1.401957  | -0.496146 |
| 25 | 1 | 0 | 2.176487  | 2.242510  | 0.137561  |
| 26 | 1 | 0 | 3.116130  | 0.761276  | 0.110677  |
| 27 | 6 | 0 | 1.598239  | -2.428291 | 0.497937  |
| 28 | 1 | 0 | 2.270908  | -2.172188 | -0.325126 |
| 29 | 1 | 0 | 0.758989  | -2.984479 | 0.070380  |
| 30 | 6 | 0 | -1.570221 | 3.493220  | 1.488000  |
| 31 | 8 | 0 | -1.636700 | 3.367055  | 2.680594  |
| 32 | 8 | 0 | -2.035752 | 4.554164  | 0.826228  |
| 33 | 1 | 0 | -2.424654 | 5.167684  | 1.466698  |
| 34 | 6 | 0 | 3.314265  | 1.954568  | -1.622633 |
| 35 | 8 | 0 | 3.075378  | 1.815795  | -2.790999 |
| 36 | 8 | 0 | 4.368659  | 2.621451  | -1.151522 |
| 37 | 1 | 0 | 4.878706  | 2.958262  | -1.902712 |
| 38 | 6 | 0 | 2.343022  | -3.370065 | 1.414669  |
| 39 | 8 | 0 | 2.527290  | -3.186187 | 2.587053  |
| 40 | 8 | 0 | 2.775877  | -4.445138 | 0.753717  |
| 41 | 1 | 0 | 3.243933  | -5.019701 | 1.376897  |

-----

### For Reaction 3

#### Reactant Complex (RC)

Standard orientation:

| Center<br>Number | Atomic<br>Number | Atomic<br>Type | Coordinates (Angstroms) |           |           |
|------------------|------------------|----------------|-------------------------|-----------|-----------|
|                  |                  |                | X                       | Y         | Z         |
| 1                | 16               | 0              | 3.025760                | -0.851992 | -0.377587 |
| 2                | 16               | 0              | 1.042740                | -0.635288 | 0.199932  |
| 3                | 6                | 0              | 3.424235                | 0.844792  | -0.895660 |
| 4                | 1                | 0              | 3.326815                | 1.534548  | -0.058972 |
| 5                | 1                | 0              | 4.461343                | 0.831271  | -1.232002 |
| 6                | 1                | 0              | 2.777096                | 1.148410  | -1.715986 |
| 7                | 6                | 0              | 1.234020                | -0.038518 | 1.907472  |
| 8                | 1                | 0              | 1.764682                | 0.912534  | 1.925861  |
| 9                | 1                | 0              | 0.218488                | 0.097636  | 2.281635  |
| 10               | 1                | 0              | 1.760724                | -0.778232 | 2.506652  |
| 11               | 6                | 0              | -2.058347               | 0.189622  | 0.842769  |
| 12               | 6                | 0              | -1.831617               | 1.050209  | -1.262757 |
| 13               | 6                | 0              | -2.398588               | -0.171666 | -1.388834 |
| 14               | 7                | 0              | -1.643320               | 1.247551  | 0.092066  |
| 15               | 7                | 0              | -2.526264               | -0.668697 | -0.104300 |
| 16               | 1                | 0              | -1.555201               | 1.781825  | -2.003810 |
| 17               | 1                | 0              | -2.719267               | -0.716863 | -2.261117 |
| 18               | 6                | 0              | -0.963182               | 2.406588  | 0.642997  |
| 19               | 1                | 0              | -1.397585               | 3.324539  | 0.246672  |
| 20               | 1                | 0              | -1.080814               | 2.384717  | 1.724082  |
| 21               | 1                | 0              | 0.100167                | 2.371007  | 0.392173  |
| 22               | 6                | 0              | -3.066944               | -1.983363 | 0.199248  |
| 23               | 1                | 0              | -2.420788               | -2.762634 | -0.207854 |
| 24               | 1                | 0              | -3.114676               | -2.080889 | 1.280999  |



25            1            0            -4.067365    -2.089365    -0.221630

---

### Transition State (TS)

Standard orientation:

---

| Center<br>Number | Atomic<br>Number | Atomic<br>Type | Coordinates (Angstroms) |           |           |
|------------------|------------------|----------------|-------------------------|-----------|-----------|
|                  |                  |                | X                       | Y         | Z         |
| 1                | 16               | 0              | -3.366861               | -0.108197 | 0.075223  |
| 2                | 16               | 0              | -1.121152               | -0.038268 | 0.160836  |
| 3                | 6                | 0              | -3.486944               | 0.780236  | -1.505201 |
| 4                | 1                | 0              | -2.979070               | 0.227379  | -2.295551 |
| 5                | 1                | 0              | -4.541808               | 0.874460  | -1.759707 |
| 6                | 1                | 0              | -3.052517               | 1.776364  | -1.419177 |
| 7                | 6                | 0              | -1.138766               | -0.962896 | 1.731891  |
| 8                | 1                | 0              | -1.606069               | -1.935942 | 1.583188  |
| 9                | 1                | 0              | -0.105730               | -1.087294 | 2.042914  |
| 10               | 1                | 0              | -1.688336               | -0.400423 | 2.485611  |
| 11               | 6                | 0              | 1.284453                | -0.011029 | 0.204076  |
| 12               | 6                | 0              | 3.327852                | -0.473306 | -0.657298 |
| 13               | 6                | 0              | 3.301597                | 0.847530  | -0.363936 |
| 14               | 7                | 0              | 2.086025                | -0.972803 | -0.307454 |
| 15               | 7                | 0              | 2.045420                | 1.105139  | 0.156027  |
| 16               | 1                | 0              | 4.104603                | -1.089878 | -1.077423 |
| 17               | 1                | 0              | 4.050294                | 1.613333  | -0.477662 |
| 18               | 6                | 0              | 1.692221                | -2.367927 | -0.444096 |
| 19               | 1                | 0              | 2.212612                | -2.983185 | 0.290182  |
| 20               | 1                | 0              | 0.618282                | -2.429811 | -0.281333 |
| 21               | 1                | 0              | 1.928509                | -2.721603 | -1.447141 |
| 22               | 6                | 0              | 1.601694                | 2.415032  | 0.611880  |
| 23               | 1                | 0              | 1.683696                | 3.139284  | -0.198399 |
| 24               | 1                | 0              | 0.562401                | 2.324726  | 0.918217  |
| 25               | 1                | 0              | 2.208586                | 2.743838  | 1.455424  |

---

### Product Complex (PC)

Standard orientation:

---

| Center<br>Number | Atomic<br>Number | Atomic<br>Type | Coordinates (Angstroms) |           |           |
|------------------|------------------|----------------|-------------------------|-----------|-----------|
|                  |                  |                | X                       | Y         | Z         |
| 1                | 16               | 0              | -3.933929               | -0.265509 | 0.139050  |
| 2                | 16               | 0              | -0.556485               | -0.068268 | 0.101305  |
| 3                | 6                | 0              | -3.524485               | 0.876491  | -1.245639 |
| 4                | 1                | 0              | -2.805117               | 0.419302  | -1.928480 |
| 5                | 1                | 0              | -4.415599               | 1.136296  | -1.819445 |

---

|    |   |   |           |           |           |
|----|---|---|-----------|-----------|-----------|
| 6  | 1 | 0 | -3.083281 | 1.802010  | -0.870017 |
| 7  | 6 | 0 | -0.630535 | -0.958007 | 1.696965  |
| 8  | 1 | 0 | -0.210914 | -1.957459 | 1.601165  |
| 9  | 1 | 0 | -0.115991 | -0.388151 | 2.467181  |
| 10 | 1 | 0 | -1.696458 | -1.018390 | 1.909566  |
| 11 | 6 | 0 | 1.189058  | 0.037462  | -0.041741 |
| 12 | 6 | 0 | 3.313389  | -0.454757 | -0.430302 |
| 13 | 6 | 0 | 3.237132  | 0.871977  | -0.151136 |
| 14 | 7 | 0 | 2.035694  | -0.953358 | -0.367140 |
| 15 | 7 | 0 | 1.916053  | 1.157618  | 0.091469  |
| 16 | 1 | 0 | 4.157376  | -1.078908 | -0.667882 |
| 17 | 1 | 0 | 4.001137  | 1.628121  | -0.102780 |
| 18 | 6 | 0 | 1.669229  | -2.351278 | -0.589103 |
| 19 | 1 | 0 | 1.801090  | -2.915302 | 0.333228  |
| 20 | 1 | 0 | 0.631309  | -2.391319 | -0.911982 |
| 21 | 1 | 0 | 2.313340  | -2.753891 | -1.366419 |
| 22 | 6 | 0 | 1.383553  | 2.481894  | 0.417853  |
| 23 | 1 | 0 | 0.887573  | 2.903919  | -0.454253 |
| 24 | 1 | 0 | 0.677794  | 2.390048  | 1.239754  |
| 25 | 1 | 0 | 2.218095  | 3.111637  | 0.712992  |

---

## ETS-NOCV Study

### NOCV Pair energy for TS of Reaction 1

Pair Energy | Orbital Eigenvalue Energy | Orbital Eigenvalue Energy

|    |        |    |         |         |     |          |         |
|----|--------|----|---------|---------|-----|----------|---------|
| 1  | -76.14 | 1  | 0.88371 | -113.26 | 258 | -0.88371 | -27.09  |
| 2  | -4.89  | 2  | 0.18494 | -55.96  | 257 | -0.18494 | -29.51  |
| 3  | -5.98  | 3  | 0.16410 | -65.56  | 256 | -0.16410 | -29.12  |
| 4  | -1.70  | 4  | 0.09026 | -91.00  | 255 | -0.09026 | -72.21  |
| 5  | -1.43  | 5  | 0.08905 | -15.52  | 254 | -0.08905 | 0.55    |
| 6  | -1.06  | 6  | 0.06773 | -53.09  | 253 | -0.06773 | -37.49  |
| 7  | -0.57  | 7  | 0.04384 | -118.43 | 252 | -0.04384 | -105.37 |
| 8  | -0.46  | 8  | 0.04246 | -69.91  | 251 | -0.04246 | -58.99  |
| 9  | -0.47  | 9  | 0.03616 | -71.69  | 250 | -0.03616 | -58.63  |
| 10 | -0.26  | 10 | 0.03187 | -27.85  | 249 | -0.03187 | -19.76  |
| 11 | -0.24  | 11 | 0.03138 | -22.75  | 248 | -0.03138 | -15.20  |
| 12 | -0.22  | 12 | 0.02698 | -100.14 | 247 | -0.02698 | -91.89  |

|    |       |    |         |          |     |          |          |
|----|-------|----|---------|----------|-----|----------|----------|
| 13 | -0.14 | 13 | 0.02448 | -66.08   | 246 | -0.02448 | -60.17   |
| 14 | -0.12 | 14 | 0.02265 | -67.62   | 245 | -0.02265 | -62.40   |
| 15 | -0.10 | 15 | 0.02087 | -87.11   | 244 | -0.02087 | -82.16   |
| 16 | -0.10 | 16 | 0.02016 | -77.60   | 243 | -0.02016 | -72.72   |
| 17 | -0.09 | 17 | 0.01856 | -48.73   | 242 | -0.01856 | -43.94   |
| 18 | -0.07 | 18 | 0.01703 | -63.46   | 241 | -0.01703 | -59.45   |
| 19 | -0.09 | 19 | 0.01619 | -64.85   | 240 | -0.01619 | -59.53   |
| 20 | -0.05 | 20 | 0.01474 | -53.54   | 239 | -0.01474 | -49.98   |
| 21 | -0.04 | 21 | 0.01086 | -178.38  | 238 | -0.01086 | -174.38  |
| 22 | -0.03 | 22 | 0.00906 | -151.87  | 237 | -0.00906 | -148.55  |
| 23 | -0.03 | 23 | 0.00893 | -55.77   | 236 | -0.00893 | -52.69   |
| 24 | -0.03 | 24 | 0.00834 | -215.82  | 235 | -0.00834 | -212.49  |
| 25 | -0.02 | 25 | 0.00693 | -108.83  | 234 | -0.00693 | -106.64  |
| 26 | -0.02 | 26 | 0.00594 | -156.34  | 233 | -0.00594 | -153.71  |
| 27 | -0.02 | 27 | 0.00293 | -2137.46 | 232 | -0.00293 | -2129.37 |
| 28 | -0.01 | 28 | 0.00207 | -1709.39 | 231 | -0.00207 | -1703.87 |
| 29 | -0.01 | 29 | 0.00194 | -1975.40 | 230 | -0.00194 | -1970.32 |
| 30 | -0.00 | 30 | 0.00126 | -1437.32 | 229 | -0.00126 | -1434.03 |
| 31 | -0.00 | 31 | 0.00120 | -1244.79 | 228 | -0.00120 | -1242.46 |
| 32 | -0.00 | 32 | 0.00111 | -1213.01 | 227 | -0.00111 | -1210.64 |
| 33 | -0.00 | 33 | 0.00104 | -1049.05 | 226 | -0.00104 | -1046.12 |

Sum of NOCV eigenvalues: 0.00000

Sum of pair energies: -94.40 kcal/mol

### **NOCV Pair energy for TS of Reaction2**

Pair Energy | Orbital Eigenvalue Energy | Orbital Eigenvalue Energy

|   |        |   |         |         |     |          |        |
|---|--------|---|---------|---------|-----|----------|--------|
| 1 | -96.91 | 1 | 0.98431 | -122.76 | 510 | -0.98431 | -24.30 |
| 2 | -7.64  | 2 | 0.23280 | -68.09  | 509 | -0.23280 | -35.25 |

|    |       |    |         |         |     |          |         |
|----|-------|----|---------|---------|-----|----------|---------|
| 3  | -8.39 | 3  | 0.19386 | -79.71  | 508 | -0.19386 | -36.42  |
| 4  | -2.60 | 4  | 0.11333 | -95.32  | 507 | -0.11333 | -72.35  |
| 5  | -1.96 | 5  | 0.10530 | -15.36  | 506 | -0.10530 | 3.27    |
| 6  | -1.38 | 6  | 0.07816 | -48.45  | 505 | -0.07816 | -30.86  |
| 7  | -0.69 | 7  | 0.05178 | -104.91 | 504 | -0.05178 | -91.68  |
| 8  | -0.75 | 8  | 0.04995 | -98.81  | 503 | -0.04995 | -83.87  |
| 9  | -0.54 | 9  | 0.04122 | -81.29  | 502 | -0.04122 | -68.16  |
| 10 | -0.38 | 10 | 0.03826 | -35.09  | 501 | -0.03826 | -25.11  |
| 11 | -0.33 | 11 | 0.03609 | -32.64  | 500 | -0.03609 | -23.43  |
| 12 | -0.30 | 12 | 0.03110 | -79.56  | 499 | -0.03110 | -69.96  |
| 13 | -0.20 | 13 | 0.02893 | -73.35  | 498 | -0.02893 | -66.40  |
| 14 | -0.19 | 14 | 0.02792 | -81.84  | 497 | -0.02792 | -74.94  |
| 15 | -0.17 | 15 | 0.02680 | -74.59  | 496 | -0.02680 | -68.38  |
| 16 | -0.17 | 16 | 0.02498 | -74.08  | 495 | -0.02498 | -67.24  |
| 17 | -0.15 | 17 | 0.02417 | -68.05  | 494 | -0.02417 | -61.92  |
| 18 | -0.13 | 18 | 0.02179 | -55.63  | 493 | -0.02179 | -49.79  |
| 19 | -0.12 | 19 | 0.02072 | -36.28  | 492 | -0.02072 | -30.68  |
| 20 | -0.10 | 20 | 0.01997 | -64.25  | 491 | -0.01997 | -59.32  |
| 21 | -0.10 | 21 | 0.01838 | -43.17  | 490 | -0.01838 | -37.91  |
| 22 | -0.05 | 22 | 0.01455 | -57.73  | 489 | -0.01455 | -54.04  |
| 23 | -0.06 | 23 | 0.01423 | -55.58  | 488 | -0.01423 | -51.26  |
| 24 | -0.06 | 24 | 0.01378 | -32.43  | 487 | -0.01378 | -28.33  |
| 25 | -0.05 | 25 | 0.01286 | -116.92 | 486 | -0.01286 | -112.69 |
| 26 | -0.04 | 26 | 0.01279 | -66.67  | 485 | -0.01279 | -63.56  |
| 27 | -0.05 | 27 | 0.01219 | -80.16  | 484 | -0.01219 | -76.02  |
| 28 | -0.03 | 28 | 0.01080 | -109.90 | 483 | -0.01080 | -106.69 |
| 29 | -0.03 | 29 | 0.01027 | -73.06  | 482 | -0.01027 | -69.85  |
| 30 | -0.04 | 30 | 0.00970 | -132.00 | 481 | -0.00970 | -128.31 |
| 31 | -0.03 | 31 | 0.00945 | -46.91  | 480 | -0.00945 | -43.75  |

|    |       |    |         |          |     |          |          |
|----|-------|----|---------|----------|-----|----------|----------|
| 32 | -0.03 | 32 | 0.00916 | -72.98   | 479 | -0.00916 | -70.00   |
| 33 | -0.03 | 33 | 0.00875 | -65.97   | 478 | -0.00875 | -63.07   |
| 34 | -0.02 | 34 | 0.00782 | -25.39   | 477 | -0.00782 | -22.25   |
| 35 | -0.02 | 35 | 0.00710 | -58.84   | 476 | -0.00710 | -56.39   |
| 36 | -0.01 | 36 | 0.00605 | -64.70   | 475 | -0.00605 | -62.22   |
| 37 | -0.01 | 37 | 0.00575 | -61.01   | 474 | -0.00575 | -58.96   |
| 38 | -0.01 | 38 | 0.00504 | -72.75   | 473 | -0.00504 | -71.21   |
| 39 | -0.01 | 39 | 0.00484 | -120.97  | 472 | -0.00484 | -119.08  |
| 40 | -0.01 | 40 | 0.00469 | -160.50  | 471 | -0.00469 | -158.39  |
| 41 | -0.01 | 41 | 0.00435 | -71.26   | 470 | -0.00435 | -69.87   |
| 42 | -0.01 | 42 | 0.00413 | -338.28  | 469 | -0.00413 | -335.45  |
| 43 | -0.01 | 43 | 0.00371 | -281.07  | 468 | -0.00371 | -278.89  |
| 44 | -0.01 | 44 | 0.00335 | -158.20  | 467 | -0.00335 | -156.63  |
| 45 | -0.00 | 45 | 0.00317 | -56.56   | 466 | -0.00317 | -55.26   |
| 46 | -0.00 | 46 | 0.00314 | -97.35   | 465 | -0.00314 | -96.14   |
| 47 | -0.00 | 47 | 0.00298 | -161.29  | 464 | -0.00298 | -159.72  |
| 48 | -0.00 | 48 | 0.00268 | -129.90  | 463 | -0.00268 | -128.69  |
| 49 | -0.00 | 49 | 0.00263 | -103.95  | 462 | -0.00263 | -102.51  |
| 50 | -0.01 | 50 | 0.00238 | -507.90  | 461 | -0.00238 | -505.22  |
| 51 | -0.01 | 51 | 0.00233 | -734.75  | 460 | -0.00233 | -731.66  |
| 52 | -0.00 | 52 | 0.00227 | -73.81   | 459 | -0.00227 | -72.88   |
| 53 | -0.01 | 53 | 0.00211 | -783.01  | 458 | -0.00211 | -780.08  |
| 54 | -0.00 | 54 | 0.00202 | -489.95  | 457 | -0.00202 | -487.75  |
| 55 | -0.00 | 55 | 0.00167 | -271.14  | 456 | -0.00167 | -269.97  |
| 56 | -0.01 | 56 | 0.00159 | -1457.91 | 455 | -0.00159 | -1454.19 |
| 57 | -0.00 | 57 | 0.00139 | -1283.09 | 454 | -0.00139 | -1280.26 |
| 58 | -0.00 | 58 | 0.00134 | -1386.66 | 453 | -0.00134 | -1383.45 |
| 59 | -0.00 | 59 | 0.00127 | -1187.25 | 452 | -0.00127 | -1184.65 |
| 60 | -0.00 | 60 | 0.00118 | -865.29  | 451 | -0.00118 | -861.69  |

61 -0.00 61 0.00105 -1471.84 450 -0.00105 -1469.49

Sum of NOCV eigenvalues: -0.00000

Sum of pair energies: -123.89 kcal/mol

### NOCV Pair energy for TS of Reaction3

Pair Energy | Orbital Eigenvalue Energy | Orbital Eigenvalue Energy

|    |        |    |         |         |     |          |         |
|----|--------|----|---------|---------|-----|----------|---------|
| 1  | -35.56 | 1  | 0.57504 | -95.83  | 298 | -0.57504 | -34.00  |
| 2  | -3.08  | 2  | 0.12724 | -67.74  | 297 | -0.12724 | -43.51  |
| 3  | -1.71  | 3  | 0.09241 | 4.65    | 296 | -0.09241 | 23.14   |
| 4  | -0.85  | 4  | 0.06512 | -46.79  | 295 | -0.06512 | -33.72  |
| 5  | -0.71  | 5  | 0.05980 | -10.01  | 294 | -0.05980 | 1.79    |
| 6  | -0.45  | 6  | 0.04296 | -45.44  | 293 | -0.04296 | -35.01  |
| 7  | -0.21  | 7  | 0.02911 | -38.46  | 292 | -0.02911 | -31.15  |
| 8  | -0.23  | 8  | 0.02847 | -86.86  | 291 | -0.02847 | -78.65  |
| 9  | -0.16  | 9  | 0.02327 | -44.14  | 290 | -0.02327 | -37.28  |
| 10 | -0.16  | 10 | 0.02051 | -67.82  | 289 | -0.02051 | -60.20  |
| 11 | -0.12  | 11 | 0.01885 | -53.45  | 288 | -0.01885 | -47.00  |
| 12 | -0.07  | 12 | 0.01711 | -61.54  | 287 | -0.01711 | -57.23  |
| 13 | -0.07  | 13 | 0.01651 | -56.63  | 286 | -0.01651 | -52.36  |
| 14 | -0.06  | 14 | 0.01528 | -32.63  | 285 | -0.01528 | -28.65  |
| 15 | -0.06  | 15 | 0.01507 | -38.25  | 284 | -0.01507 | -34.27  |
| 16 | -0.06  | 16 | 0.01415 | -30.24  | 283 | -0.01415 | -26.28  |
| 17 | -0.05  | 17 | 0.01323 | -75.20  | 282 | -0.01323 | -71.29  |
| 18 | -0.04  | 18 | 0.01232 | -66.42  | 281 | -0.01232 | -63.11  |
| 19 | -0.05  | 19 | 0.01158 | -36.90  | 280 | -0.01158 | -32.81  |
| 20 | -0.03  | 20 | 0.00989 | -44.25  | 279 | -0.00989 | -41.16  |
| 21 | -0.03  | 21 | 0.00874 | -108.32 | 278 | -0.00874 | -104.68 |
| 22 | -0.02  | 22 | 0.00816 | -88.56  | 277 | -0.00816 | -85.81  |
| 23 | -0.02  | 23 | 0.00758 | -87.89  | 276 | -0.00758 | -85.52  |

|    |       |    |         |          |     |          |          |
|----|-------|----|---------|----------|-----|----------|----------|
| 24 | -0.02 | 24 | 0.00699 | -117.51  | 275 | -0.00699 | -115.00  |
| 25 | -0.01 | 25 | 0.00681 | -103.56  | 274 | -0.00681 | -101.46  |
| 26 | -0.01 | 26 | 0.00658 | -102.73  | 273 | -0.00658 | -100.48  |
| 27 | -0.02 | 27 | 0.00625 | -106.68  | 272 | -0.00625 | -104.21  |
| 28 | -0.01 | 28 | 0.00532 | -168.47  | 271 | -0.00532 | -165.76  |
| 29 | -0.01 | 29 | 0.00427 | -117.28  | 270 | -0.00427 | -115.43  |
| 30 | -0.00 | 30 | 0.00304 | -120.34  | 269 | -0.00304 | -119.00  |
| 31 | -0.00 | 31 | 0.00289 | -211.27  | 268 | -0.00289 | -209.79  |
| 32 | -0.00 | 32 | 0.00233 | -246.26  | 267 | -0.00233 | -245.03  |
| 33 | -0.01 | 33 | 0.00183 | -2194.15 | 266 | -0.00183 | -2189.01 |
| 34 | -0.01 | 34 | 0.00138 | -2019.37 | 265 | -0.00138 | -2015.22 |
| 35 | -0.00 | 35 | 0.00133 | -1588.97 | 264 | -0.00133 | -1585.72 |

Sum of NOCV eigenvalues: -0.00000

Sum of pair energies: -43.92 kcal/mol
